# Supplementary material for: Silver nanoparticles prepared by gamma irradiation across metal–organic framework templates
Source: Royal Society of Chemistry journal article supplement (doi:10.1039/c4ra10260f), 2015-01-01
Supplement: c4ra10260f1.pdf [file c4ra10260f1.pdf]

## Supporting information

### **Single step reduction of silver ions across metal organic framework templates under gamma irradiation**

*Li He \*, Ludovic F. Dumée, Dan Liu , Leonora Velleman, Fenghua She, Connie Banos, Justin B. Davies, Lingxue Kong*

This material is available free of charge via the Internet at <http://pubs.acs.org>.

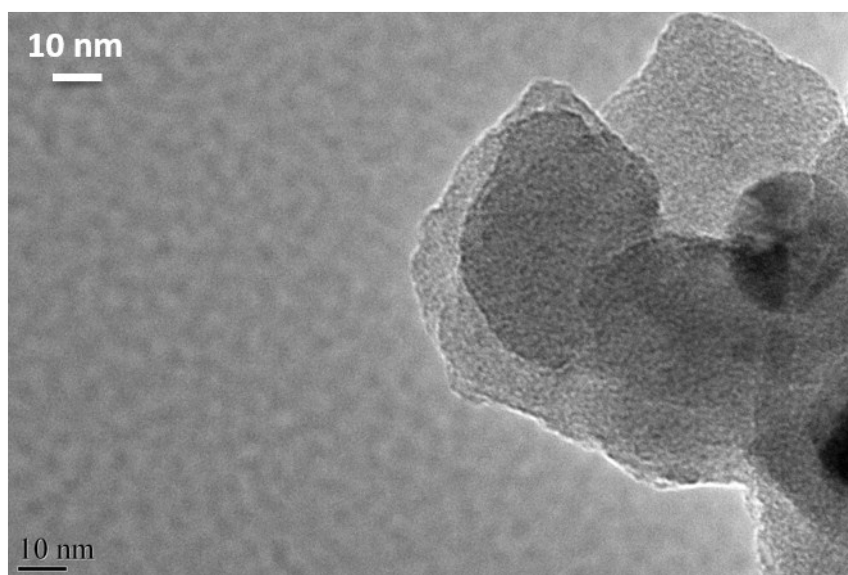

Figure S1 TEM of HKUST-1 crystals

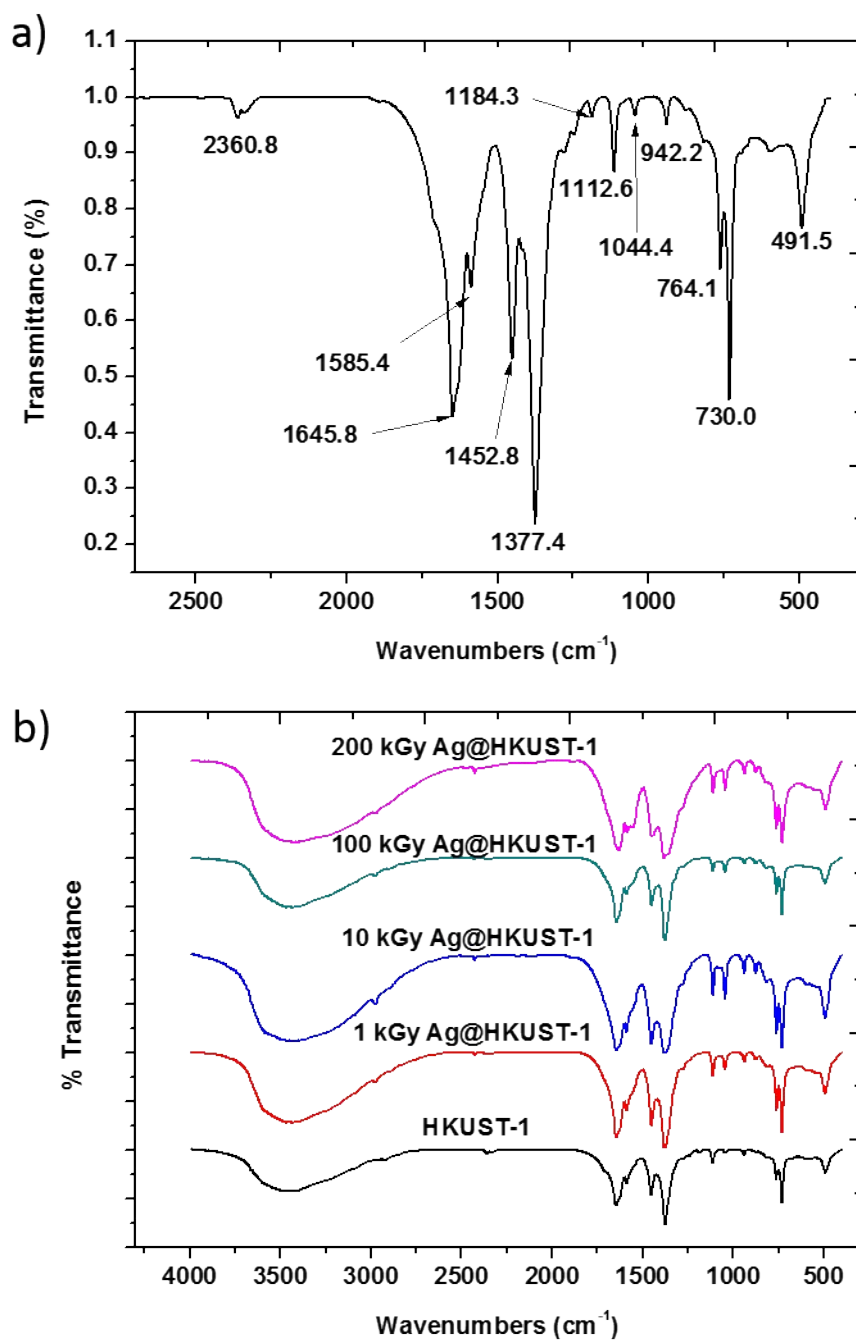

Figure S2 FTIR spectrum of a) HKUST-1 crystals b) Ag@HKUST-1 with different irradiation doses.

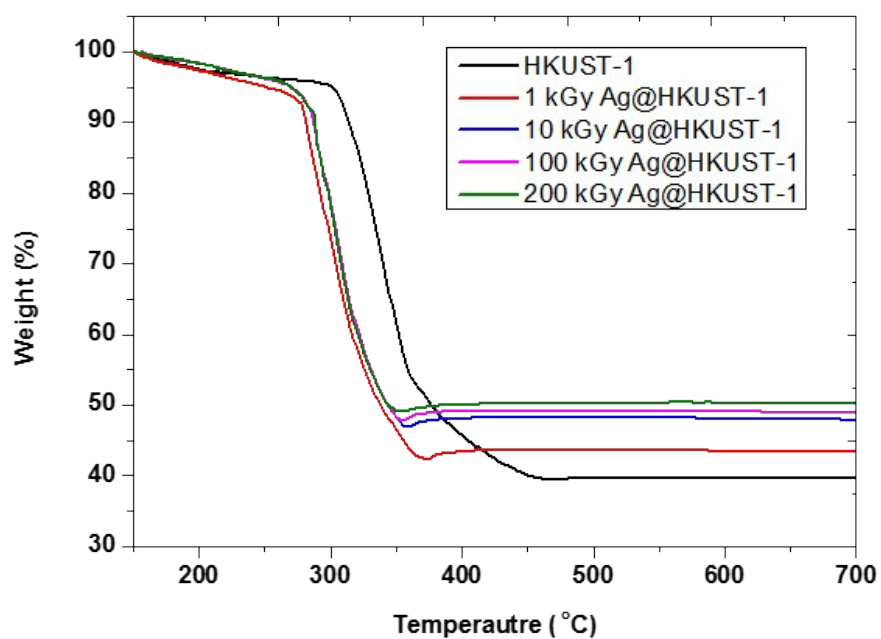

**Figure S3** TGA results of Ag@HKUST-1 crystals with different loadings of Ag

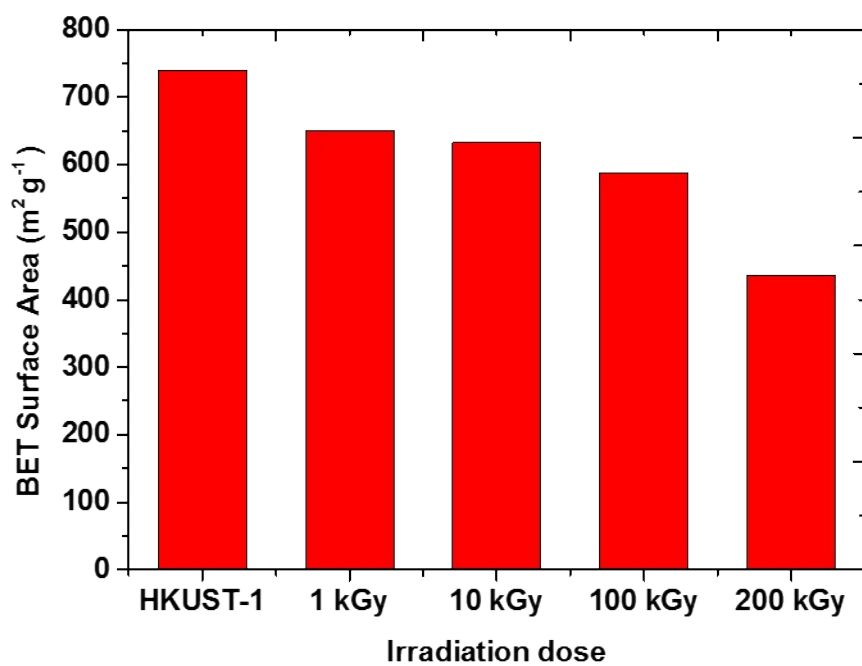

**Figure S4** BET surface area of Ag@HKUST-1 crystals

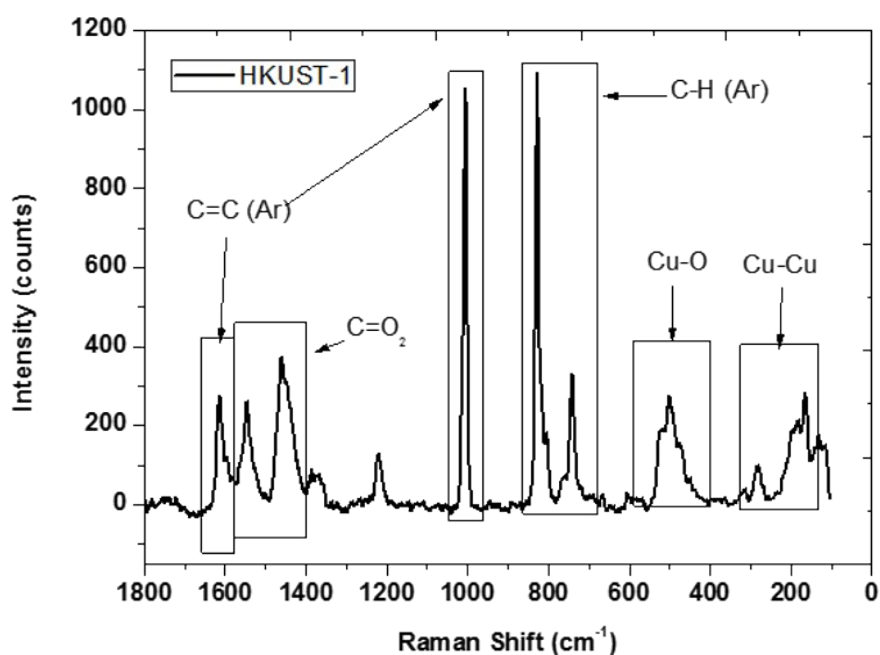

**Figure S5** Raman spectra of HKUST-1 with a  $\lambda=514$  nm

As shown in **Figure S6**, in the absence of any catalysts, the 4-NP solution normally exhibits an absorbance peak at 317 nm, when exposed to freshly prepared  $\text{NaBH}_4$  reducing agents, the 4-NP absorption peak immediately reduced and a new peak at 400 nm was formed. This shift was due to the formation of 4-nitrophenolate ions, subsequently leading to a sharp colour change from yellow to dark yellow-green. Small concentrations of  $\text{Ag@HKUST-1}$  crystals were used in these tests to properly evaluate the kinetics of degradation by in-situ recording the absorption spectra peak intensity change of 4-NP. The reduction process was therefore visualized through the progressive disappearance of the 400 nm peak corresponding with the concomitant appearance of the new peak at 300 nm.

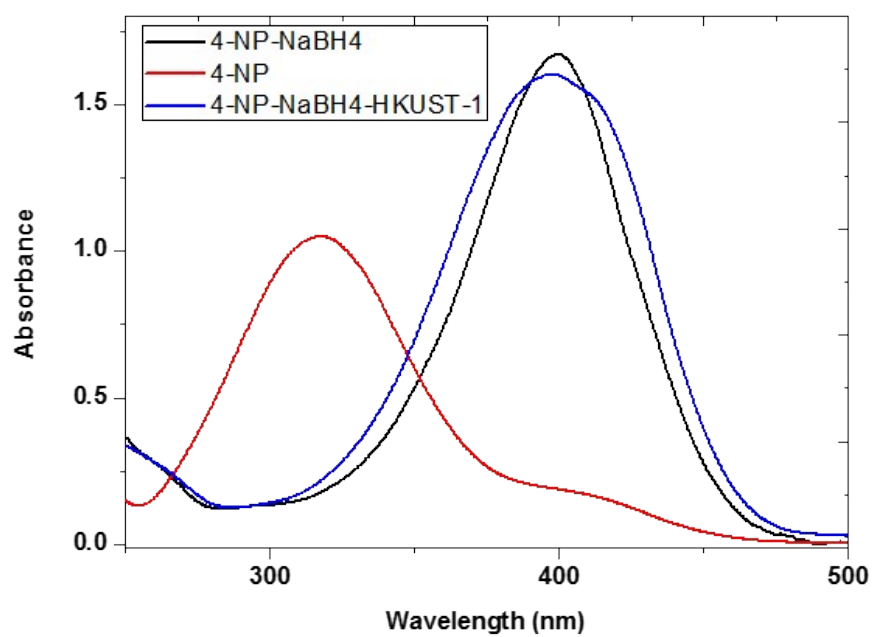

Figure S6 UV-vis spectra of 4-NP (red), 4-NP with NaBH<sub>4</sub> (black) and HKUST-1 with 4-NP and NaBH<sub>4</sub> (blue)

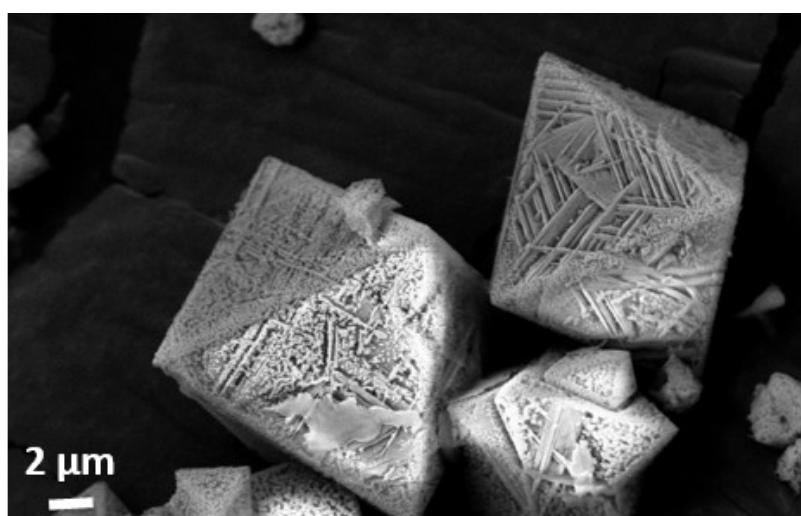

Figure S7 100 kGy Ag@HKUST-1 after 5 cycle

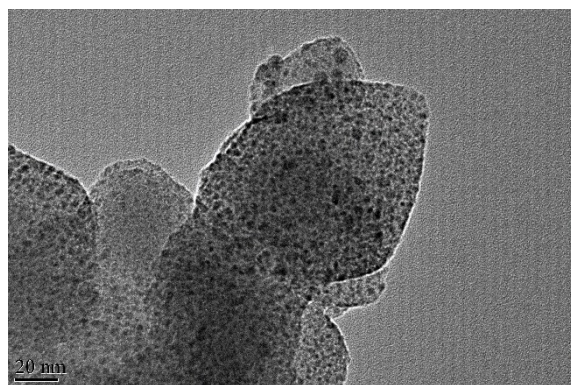

Figure S8 100 kGy Ag@HKUST-1 after 5 cycle
